# Supplementary material for: Mitochondrial DNA Copy Number, but Not Haplogroup, Confers a Genetic Susceptibility to Leprosy in Han Chinese from Southwest China
Source: PubMed Central journal article supplement (PMC3377694; doi:10.1371/journal.pone.0038848), 2012-06-18
Supplement: pone.0038848.s001.pdf [file pone.0038848.s001.pdf]

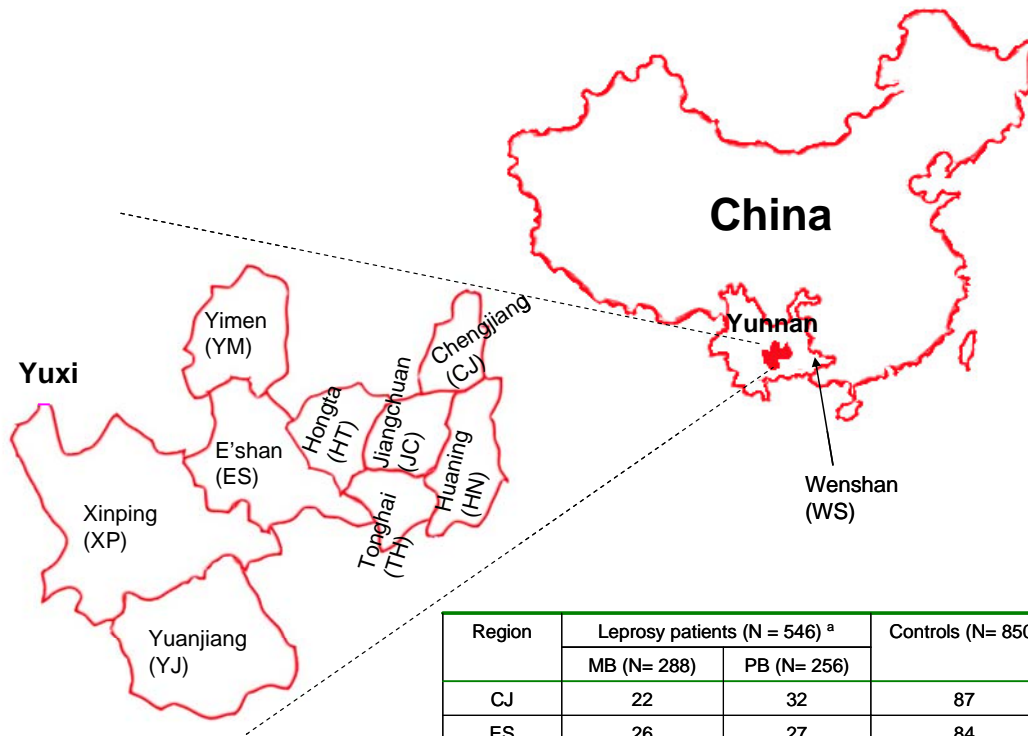

| Region | Leprosy patients (N = 546) <sup>a</sup> |             | Controls (N= 850) |
|--------|-----------------------------------------|-------------|-------------------|
|        | MB (N= 288)                             | PB (N= 256) |                   |
| CJ     | 22                                      | 32          | 87                |
| ES     | 26                                      | 27          | 84                |
| HN     | 71                                      | 27          | 164               |
| HT     | 36                                      | 31          | 107               |
| JC     | 36                                      | 40          | 123               |
| TH     | 39                                      | 41          | 123               |
| XP     | 13                                      | 5           | 26                |
| YJ     | 11                                      | 4           | 22                |
| YM     | 29                                      | 42          | 114               |
| WS     | 5                                       | 7           | 0                 |

<sup>a</sup> Two leprosy patients (one in HN and one in YJ) had unclear leprosy type and were excluded.
