# Supplementary material for: Mitochondrial DNA Copy Number, but Not Haplogroup, Confers a Genetic Susceptibility to Leprosy in Han Chinese from Southwest China
Source: PubMed Central journal article supplement (PMC3377694; doi:10.1371/journal.pone.0038848), 2012-06-18
Supplement: pone.0038848.s003.pdf [file pone.0038848.s003.pdf]

Table S2. mtDNA copy number in leprosy patients (n=296) and controls (n=231) with different haplogroup status

| Haplogroup*          | Leprosy patients |                   | Controls |                   | P-value <sup>#</sup> |
|----------------------|------------------|-------------------|----------|-------------------|----------------------|
|                      | No.              | Mean $\pm$ SD     | No.      | Mean $\pm$ SD     |                      |
| C                    | 11               | 56.14 $\pm$ 35.45 | 11       | 51.72 $\pm$ 12.32 | 0.700                |
| Z                    | 9                | 64.61 $\pm$ 49.30 | 8        | 57.09 $\pm$ 11.60 | 0.668                |
| M7b                  | 8                | 72.18 $\pm$ 40.66 | 12       | 56.86 $\pm$ 19.45 | 0.271                |
| M9a                  | 7                | 50.25 $\pm$ 21.26 | 5        | 47.63 $\pm$ 16.95 | 0.824                |
| D4                   | 29               | 75.41 $\pm$ 49.58 | 30       | 59.44 $\pm$ 22.59 | 0.115                |
| D5                   | 10               | 48.34 $\pm$ 14.83 | 10       | 55.60 $\pm$ 12.98 | 0.259                |
| G                    | 20               | 58.02 $\pm$ 30.05 | 16       | 54.99 $\pm$ 24.96 | 0.734                |
| A                    | 25               | 56.08 $\pm$ 28.73 | 20       | 65.96 $\pm$ 18.16 | 0.188                |
| N9a                  | 9                | 70.60 $\pm$ 52.77 | 10       | 66.98 $\pm$ 20.06 | 0.841                |
| B4                   | 48               | 70.09 $\pm$ 34.27 | 26       | 69.51 $\pm$ 17.13 | 0.936                |
| B5                   | 18               | 57.78 $\pm$ 28.74 | 8        | 58.96 $\pm$ 15.77 | 0.915                |
| F                    | 58               | 72.71 $\pm$ 43.57 | 40       | 61.00 $\pm$ 18.04 | 0.071                |
| P-value <sup>‡</sup> |                  | 0.379             |          | 0.132             |                      |

\* Haplogroups occurred in less than four individuals were excluded.

<sup>#</sup> P-value was calculated by student's unpaired *t* test (two tailed).

<sup>‡</sup> P-value of one-way analysis of variance (ANOVA) for the difference of mtDNA copy number among different haplogroups.
